# Supplementary material
Source: publisher site journal article supplement (https://www.dovepress.com/article/313028)
Supplement: Supplementary file 1 [file get_supplementary_file.php]

**Suppl Table A**

Clinical and biochemical characteristics of the study cohort according to sex

|                                                 | <b>Male<br/>n = 42</b> | <b>Female<br/>n = 38</b> | <b>p value</b> |
|-------------------------------------------------|------------------------|--------------------------|----------------|
| Age (years)                                     | 79 [75, 85]            | 79 [72, 85]              | 0.7104         |
| Type 2 diabetes (n, %)                          | 11, 26.2               | 11, 29.0                 | 0.7827         |
| Hypertension (n, %)                             | 22, 52.4               | 24, 63.1                 | 0.3302         |
| Heart failure (n, %)                            | 4, 9.5                 | 5, 13.1                  | 0.6075         |
| Atrial fibrillation (n, %)                      | 10, 23.8               | 6, 15.8                  | 0.3705         |
| ASCVD (n; %)                                    | 13, 31.0               | 6, 15.8                  | 0.1115         |
| ACEi/ARB (n; %)                                 | 22, 52.4               | 18, 47.4                 | 0.6543         |
| Statins (n, %)                                  | 13, 31.0               | 8, 21.0                  | 0.3149         |
| Antithrombotic therapy (n, %)                   | 23, 54.7               | 18, 47.4                 | 0.5088         |
| eGFR <60 ml/min/1.73m <sup>2</sup> (n, %)       | 21, 50.0               | 16, 42.1                 | 0.4794         |
| Deceased (n, %)                                 | 10, 23.8               | 4, 10.5                  | 0.1184         |
| Discharged (n, %)                               | 32, 76.2               | 34, 89.5                 | 0.1184         |
|                                                 |                        |                          |                |
| Random plasma glucose (mg/dl)                   | 138 [114, 179]         | 125 [104, 147]           | 0.1012         |
| Serum creatinine (mg/dl)                        | 1.2 [1.0, 1.4]         | 0.9 [0.7, 1.2]           | <b>0.0048</b>  |
| eGFR (ml/min/1.73 m <sup>2</sup> )              | 60.7 ± 20.2            | 59.6 ± 17.4              | 0.8004         |
| Serum Na <sup>2+</sup> (mEq/l)                  | 136 [134, 140]         | 138 [136, 140]           | 0.2155         |
| Serum K <sup>+</sup> (mEq/l)                    | 4.1 ± 0.57             | 4.05 ± 0.47              | 0.6072         |
| BUN (mmol/l)                                    | 23 [18, 34]            | 23 [18, 29]              | 0.7567         |
| CRP (mg/dl)                                     | 7.7 [2.6, 12.8]        | 5.2 [2.2, 11.3]          | 0.4598         |
| IL-6 (pg/ml)                                    | 13.6 [7.0, 29.6]       | 22.3 [ 6.1, 30.0]        | 0.6021         |
| Ferritin (µg/l)                                 | 702 [357, 1297]        | 326 [201, 665]           | <b>0.0027</b>  |
| Fibrinogen (mg/dl)                              | 515 ± 157              | 491 ± 127                | 0.4485         |
| D-dimer (mg/l)                                  | 0.5 [0.3, 1.0]         | 0.4 [0.3, 0.6]           | 0.2090         |
| HS Troponine (ng/l)                             | 19 [10, 35]            | 20 [10, 40]              | 0.8820         |
| BNP (pg/ml)                                     | 85 [30, 217]           | 55 [40, 153]             | <b>0.0231</b>  |
|                                                 |                        |                          |                |
| pH                                              | 7.47 [7.43, 7.49]      | 7.46 [7.44, 7.50]        | 0.6511         |
| PaO <sub>2</sub> (mmHg)                         | 60 [53, 74]            | 61 [55, 71]              | 0.9124         |
| PaCO <sub>2</sub> (mmHg)                        | 33 [31, 36]            | 35 [31, 38]              | 0.1643         |
| HCO <sub>3</sub> <sup>-</sup> (mmol/l)          | 24.0 ± 3.3             | 26.3 ± 2.6               | 0.0630         |
| PaO <sub>2</sub> /FiO <sub>2</sub> (P/F) (mmHg) | 276 [239, 323]         | 286 [234, 316]           | 0.7718         |

Wilcoxon/Kruskal-Wallis Tests (Rank Sums). Statistically significant values are in bold.

**Suppl Table B** Clinical and biochemical characteristics of the study cohort according to the presence of type 2 diabetes.

|                                                 | Type 2 diabetes<br>n = 22 | Normal glucose<br>metabolism<br>n = 58 | p value       |
|-------------------------------------------------|---------------------------|----------------------------------------|---------------|
| Age (years)                                     | 79 [74, 85]               | 79 [73, 85]                            | 0.6780        |
| Male (n, %)                                     | 11, 50.0                  | 31, 53.5                               | 0.7827        |
| Hypertension (n, %)                             | 18; 82.0                  | 28, 48.3                               | <b>0.0067</b> |
| Heart failure (n, %)                            | 5, 22.7                   | 4, 6.9                                 | <b>0.0454</b> |
| Atrial fibrillation (n, %)                      | 4, 18.2                   | 12, 20.7                               | 0.8023        |
| ASCVD (n, %)                                    | 6, 27.2                   | 13, 22.4                               | 0.6484        |
| ACEi/ARB (n, %)                                 | 15, 68.2                  | 25, 43.1                               | <b>0.0452</b> |
| Statins (n, %)                                  | 9, 40.0                   | 12, 20.1                               | 0.0665        |
| Antithrombotic therapy (n, %)                   | 12, 54.5                  | 29, 50.0                               | 0.7165        |
| eGFR <60 ml/min/1.73m <sup>2</sup> (n, %)       | 9, 41.0                   | 28, 48.3                               | 0.5551        |
| Deceased (n, %)                                 | 4, 18.2                   | 10, 17.3                               | 0.9213        |
| Discharged (n, %)                               | 18, 81.8                  | 48, 82.7                               | 0.9213        |
|                                                 |                           |                                        |               |
| Random plasma glucose (mg/dl)                   | 174 [128, 234]            | 124 [111, 140]                         | <b>0.0022</b> |
| Fasting plasma glucose (mg/dl)                  | 179 [120, 240]            | 108 [91, 134]                          | <b>0.0005</b> |
| HbA1c (mmol/l)                                  | 56 [51, 69]               | ---                                    | ---           |
| Serum creatinine (mg/dl)                        | 1.1 [0.8, 1.2]            | 1.0 [0.8, 1.4]                         | 0.7100        |
| eGFR (ml/min/1.73m <sup>2</sup> )               | 58.0 ± 18.7               | 61.0 ± 19.0                            | 0.5080        |
| Serum Na <sup>2+</sup> (mEq/l)                  | 136 [134, 139]            | 138 [136, 141]                         | <b>0.0206</b> |
| Serum K <sup>+</sup> (mEq/l)                    | 4.3 ± 0.4                 | 4.0 ± 0.5                              | <b>0.0284</b> |
| BUN (mmol/l)                                    | 23 [17, 33]               | 23 [21, 31]                            | 0.4608        |
| CRP (mg/dl)                                     | 9.6 [3.0, 13.4]           | 6.2 [2.3, 12.3]                        | 0.2796        |
| IL-6 (pg/ml)                                    | 19.0 [7.0, 29.2]          | 19.6 [6.8, 30.0]                       | 0.7144        |
| Ferritin (µg/l)                                 | 357 [202, 648]            | 561 [281, 927]                         | 0.1616        |
| Fibrinogen (mg/dl)                              | 551 ± 145                 | 485 ± 140                              | 0.0687        |
| D-dimer (mg/l)                                  | 0.5 [0.3, 1.4]            | 0.4 [0.2, 0.8]                         | 0.5005        |
| HS Troponine (ng/l)                             | 20 [13, 42]               | 20 [9, 30]                             | 0.3700        |
| BNP (pg/ml)                                     | 63 [46, 188]              | 60 [31, 208]                           | 0.6758        |
|                                                 |                           |                                        |               |
| pH                                              | 7.45 [7.42, 7.47]         | 7.47 [7.45, 7.50]                      | <b>0.0453</b> |
| PaO <sub>2</sub> (mmHg)                         | 64 [56, 76]               | 61 [51, 70]                            | 0.1657        |
| PaCO <sub>2</sub> (mmHg)                        | 34 [31, 37]               | 33 [31, 38]                            | 0.6581        |
| HCO <sub>3</sub> <sup>-</sup> (mmol/l)          | 24.5 ± 3.0                | 25.3 ± 3.3                             | 0.3591        |
| PaO <sub>2</sub> /FiO <sub>2</sub> (P/F) (mmHg) | 276 [247, 340]            | 281 [33, 313]                          | 0.6891        |

Wilcoxon/Kruskal-Wallis Tests (Rank Sums). Statistically significant values are in bold.

**Suppl Table C** Clinical and biochemical characteristics according to outcome in patients with type 2 diabetes.

|                                                 | <b>Discharged<br/>n = 18</b> | <b>Deceased<br/>n = 4</b> | <b>p value</b> |
|-------------------------------------------------|------------------------------|---------------------------|----------------|
| Age (years)                                     | 78 [73, 84]                  | 85 [79, 90]               | 0.1474         |
| Male (n, %)                                     | 8, 44.4                      | 3, 75.0                   | 0.2689         |
| Hypertension (n, %)                             | 15, 83.3                     | 3, 75.0                   | 0.6959         |
| Heart failure (n, %)                            | 4, 22.2                      | 1, 25.0                   | 0.9046         |
| Atrial fibrillation (n, %)                      | 3, 16.7                      | 1, 25.0                   | 0.6959         |
| ASCVD (n, %)                                    | 5, 27.8                      | 1, 25.0                   | 0.9102         |
| ACEi/ARB (n; %)                                 | 13, 72.2                     | 2, 50.0                   | 0.3881         |
| Statins (n, %)                                  | 6, 33.3                      | 3, 75.0                   | 0.1252         |
| Antithrombotic therapy (n, %)                   | 10, 55.5                     | 2, 50.0                   | 0.8400         |
| eGFR <60 ml/min/1.73m <sup>2</sup> (n, %)       | 6, 33.3                      | 3, 75.0                   | 0.1252         |
|                                                 |                              |                           |                |
| Random plasma glucose (mg/dl)                   | 170 [119, 195]               | 221 [170, 265]            | 0.2021         |
| Fasting plasma glucose (mg/dl)                  | 175 [113, 238]               | 229 [198, 260]            | 0.1315         |
| HbA1c (mmol/l)                                  | 54 [51, 66]                  | 57 [52, 63]               | 0.1388         |
| Serum creatinine (mg/dl)                        | 1.0 [0.8, 1.2]               | 1.5 [1.1, 2.5]            | <b>0.0368</b>  |
| eGFR (ml/min/1.73m <sup>2</sup> )               | 62.3 ± 16.1                  | 38.2 ± 18.2               | <b>0.0154</b>  |
| Serum Na <sup>2+</sup> (mEq/l)                  | 136 [134, 139]               | 133 [129, 138]            | 0.3909         |
| Serum K <sup>+</sup> (mEq/l)                    | 4.3 ± 0.4                    | 4.2 ± 0.2                 | 0.6016         |
| BUN (mmol/l)                                    | 22 [19, 27]                  | 35 [25, 64]               | 0.0597         |
| CRP (mg/dl)                                     | 5.5 [2.2, 13.2]              | 13.0 [5.8, 26.0]          | 0.2113         |
| IL-6 (pg/ml)                                    | 21.4 [11.0, 29.0]            | 11.0 [4.3, 33.0]          | 0.7115         |
| Ferritin (µg/l)                                 | 311 [190, 592]               | 649 [341, 1599]           | 0.1706         |
| Fibrinogen (mg/dl)                              | 533 ± 148                    | 631 ± 115                 | 0.2288         |
| D-dimer (mg/l)                                  | 0.5 [0.3, 2.7]               | 0.6 [0.3, 1.3]            | 0.9479         |
| HS Troponine (ng/l)                             | 17 [10, 36]                  | 38 [21, 57]               | 0.1837         |
| BNP (pg/ml)                                     | 63 [40, 189]                 | 185 [56, 192]             | 0.4491         |
|                                                 |                              |                           |                |
| pH                                              | 7.45 [7.42, 7.46]            | 7.49 [7.42, 7.49]         | 0.3119         |
| PaO <sub>2</sub> (mmHg)                         | 70 [59, 79]                  | 53 [51, 58]               | <b>0.0207</b>  |
| PaCO <sub>2</sub> (mmHg)                        | 34 [32, 37]                  | 27 [23, 40]               | 0.2663         |
| HCO <sub>3</sub> <sup>-</sup> (mmol/l)          | 25.0 ± 2.8                   | 22.5 ± 4.0                | 0.2124         |
| PaO <sub>2</sub> /FiO <sub>2</sub> (P/F) (mmHg) | 283 [251, 352]               | 252 [243, 276]            | <b>0.0442</b>  |

Wilcoxon/Kruskal-Wallis Tests (Rank Sums). Statistically significant values are in bold.

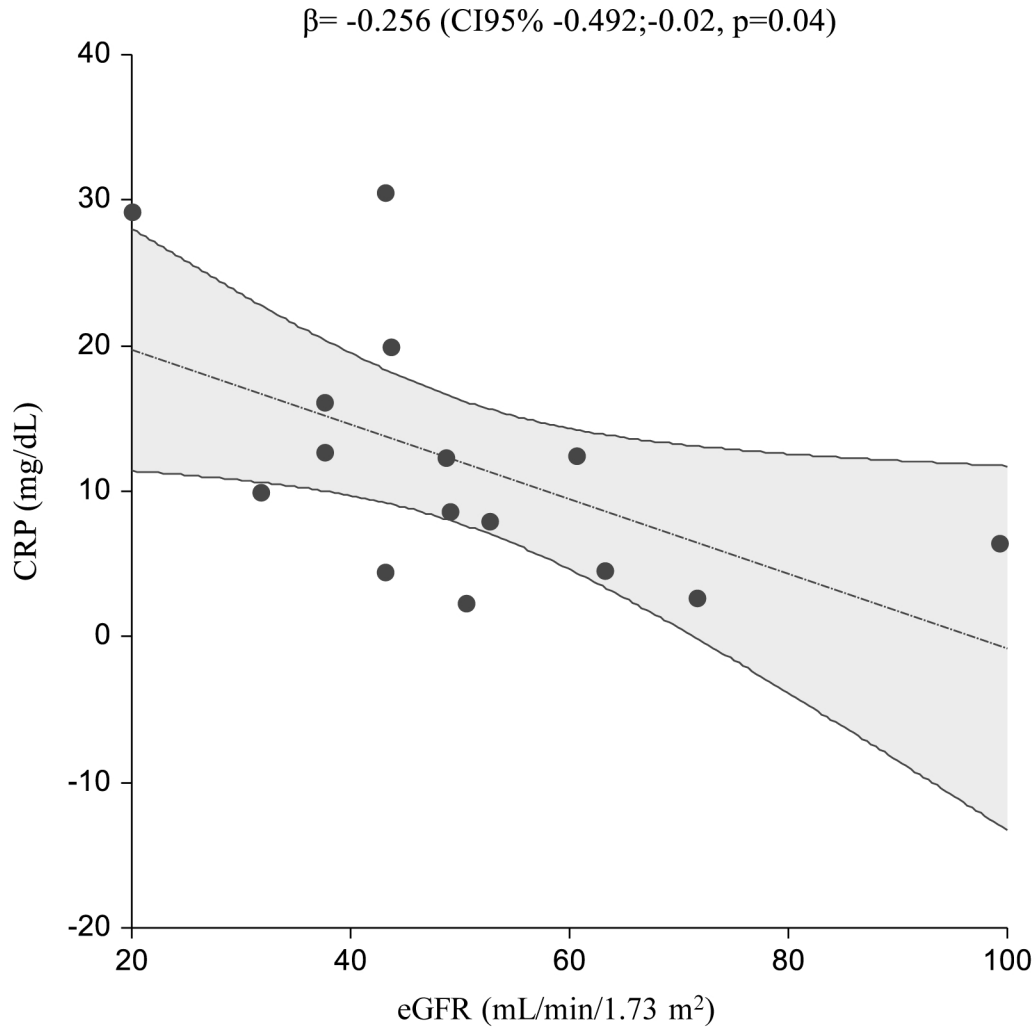

**Suppl Figure A**

Linear regression between eGFR at admission (independent variable) and CRP levels at admission (dependent variable) in deceased patients with age  $\geq 65$  years.

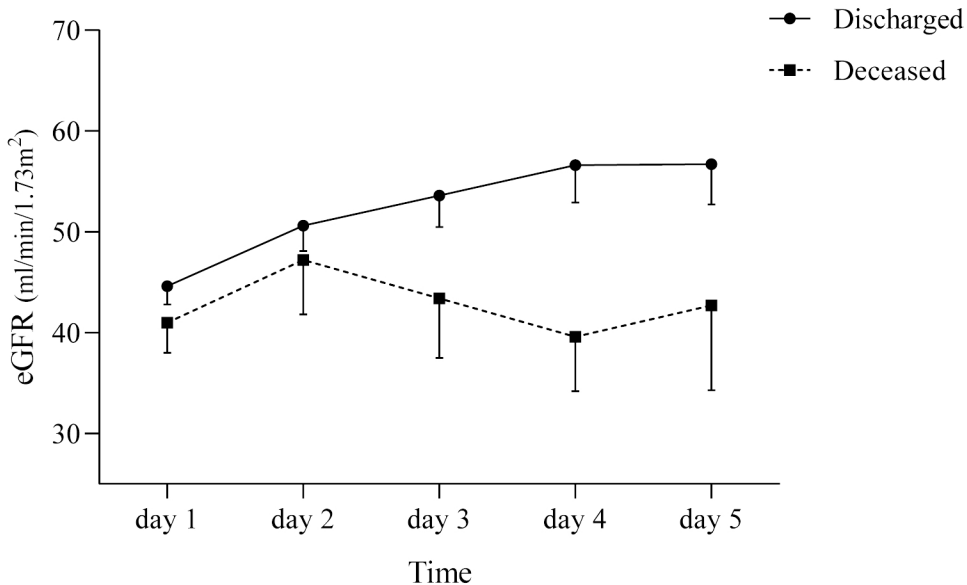

**Suppl Figure B** Glomerular function according to clinical outcome (circles= discharged; squares=deceased) in the subset of elderly patients with CKD III at baseline. Data are shown as mean±SE.

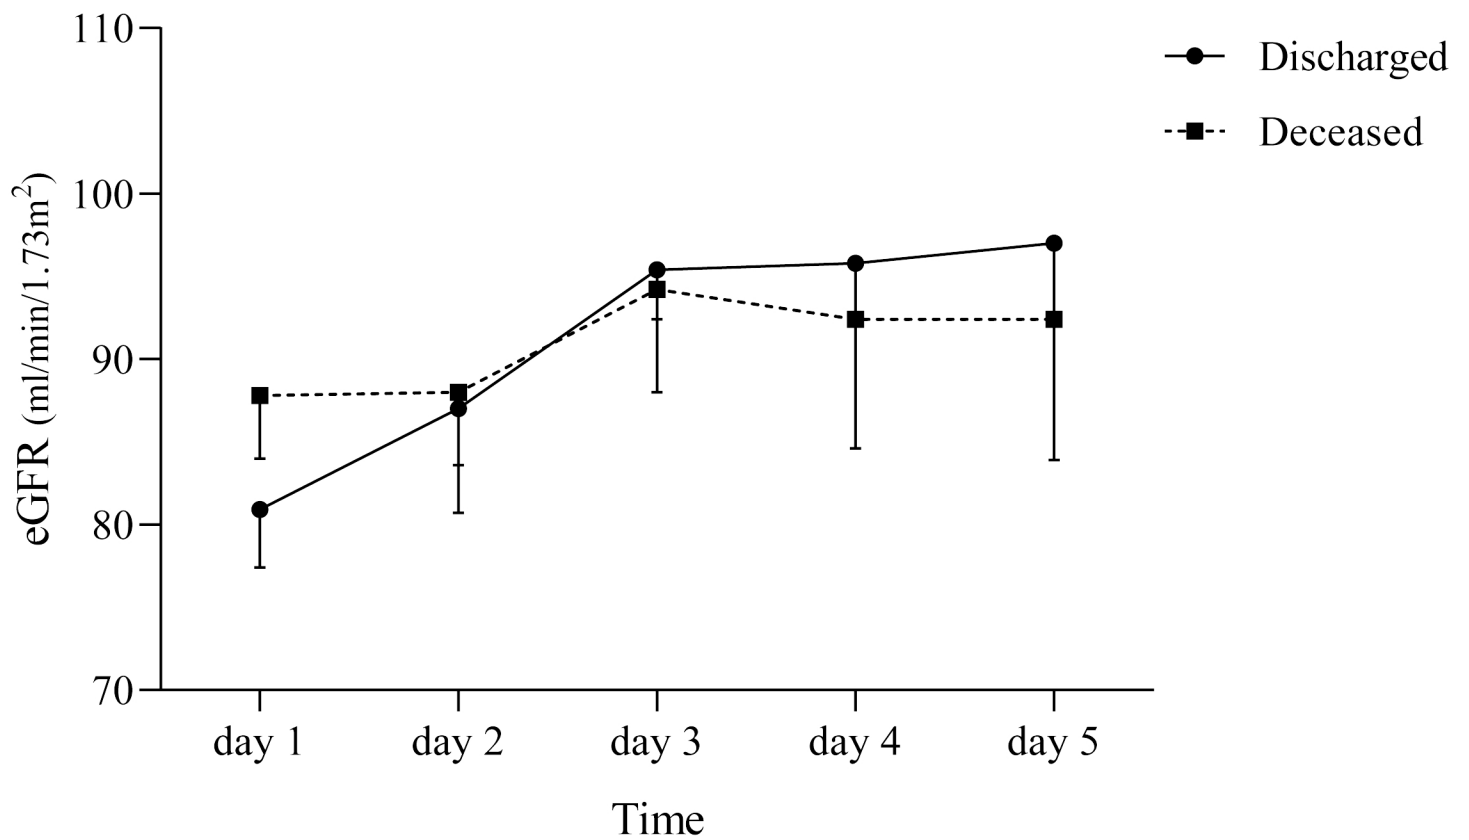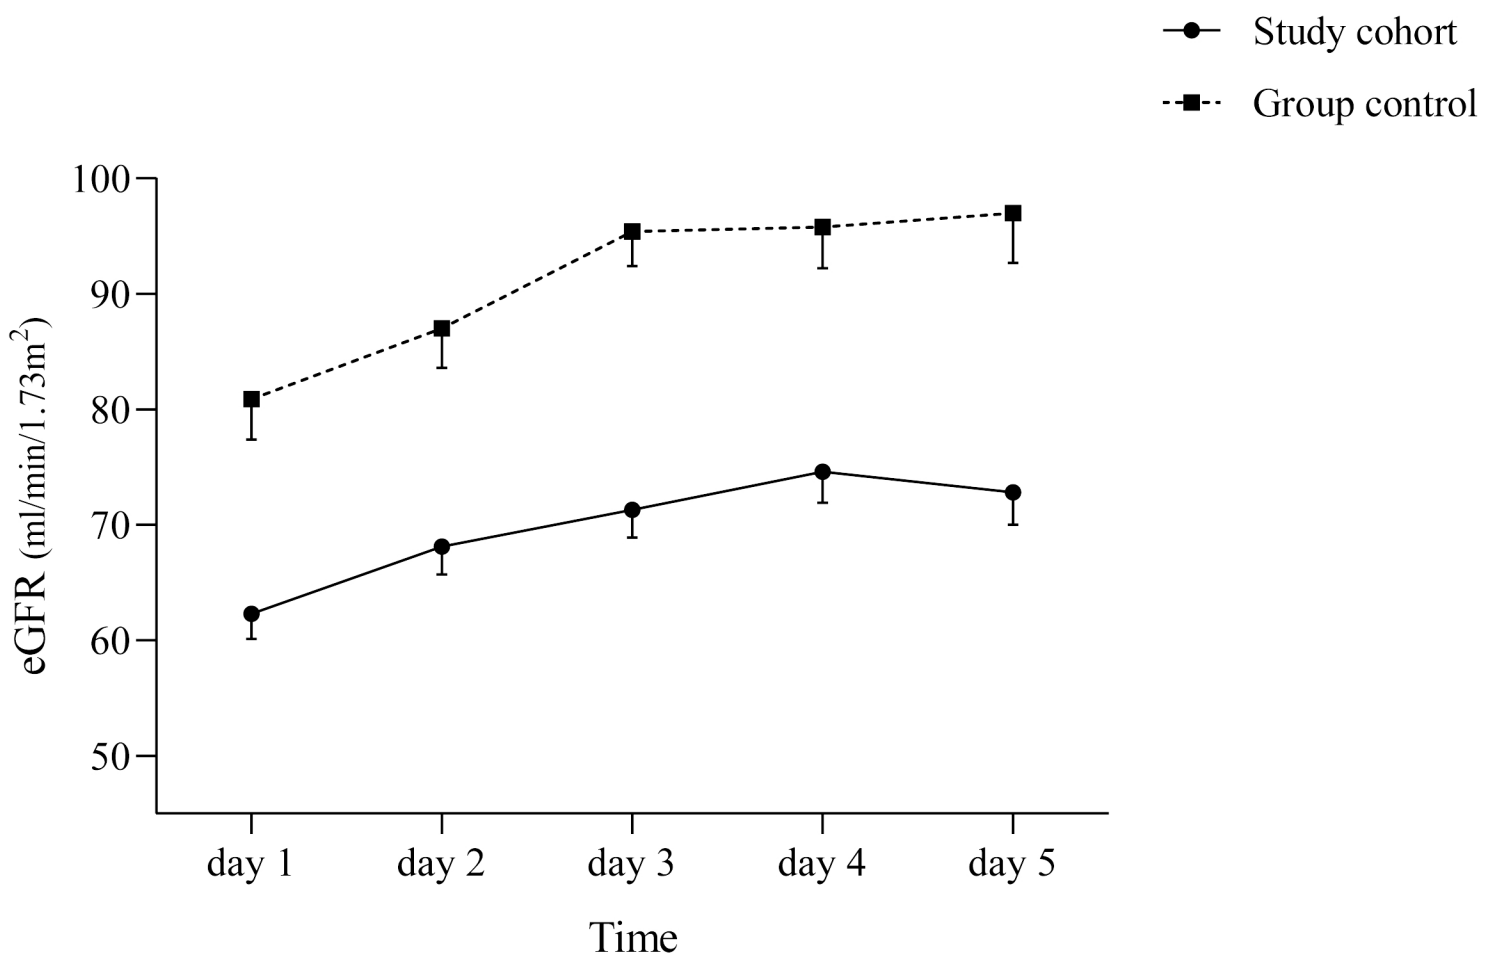

**Suppl Figure C** Upper panel: Glomerular function according to clinical outcome (circles= discharged; squares=deceased) in the whole control group. Lower panel: Glomerular function in discharged elderly (circles) and young (squares) patients. Data are shown as mean±SE
